# Supplementary material for: Degradation of Norfloxacin in an Aqueous Solution by the Nanoscale Zero-Valent Iron-Activated Persulfate Process
Source: Hindawi journal article supplement (doi:10.1155/2020/3286383), 2020-09-01

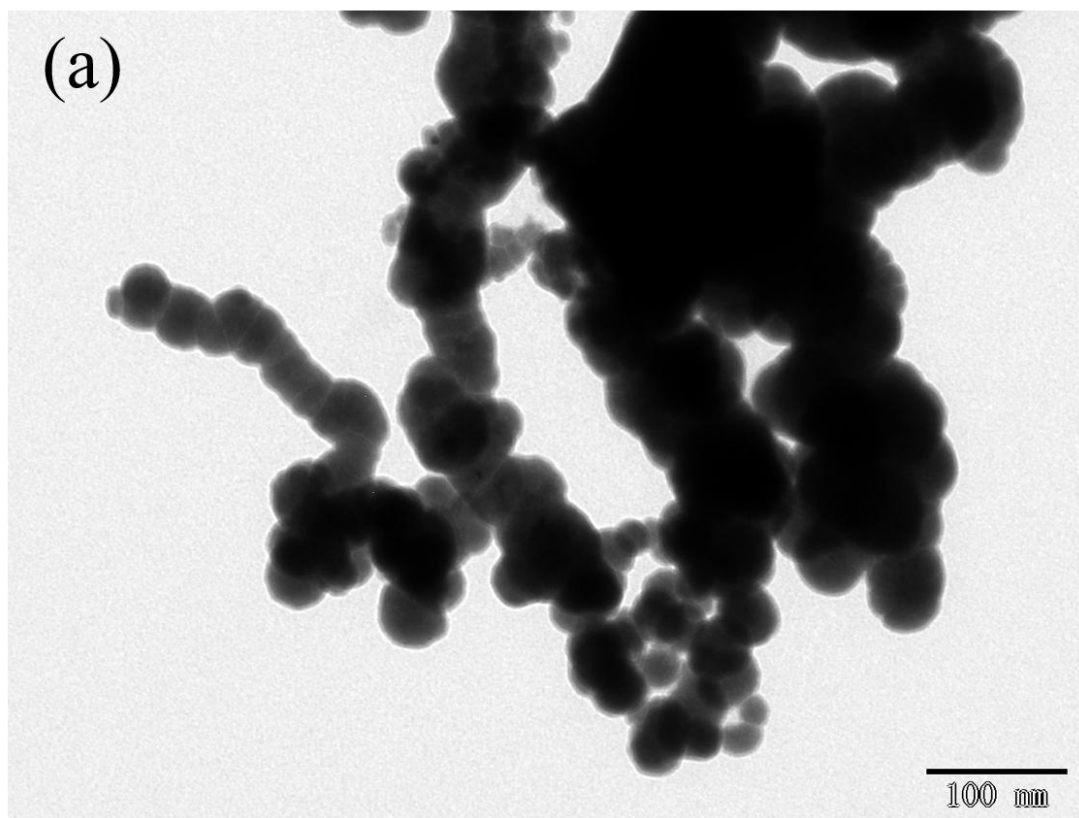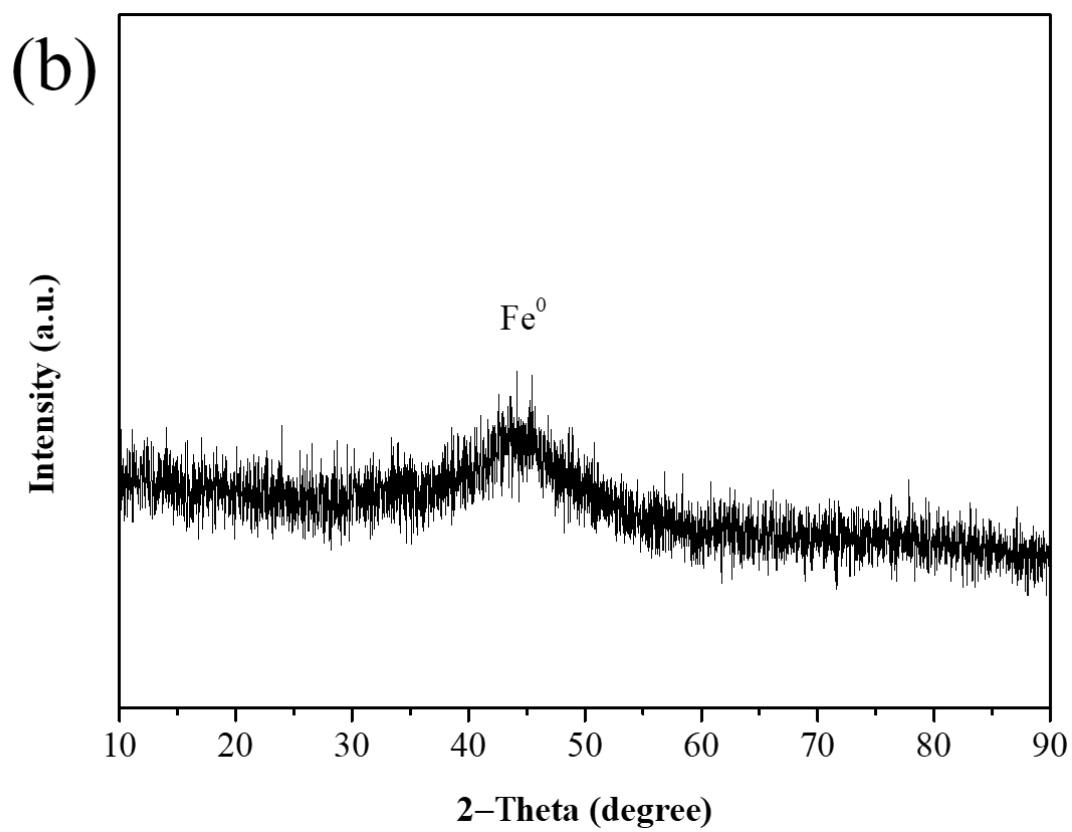

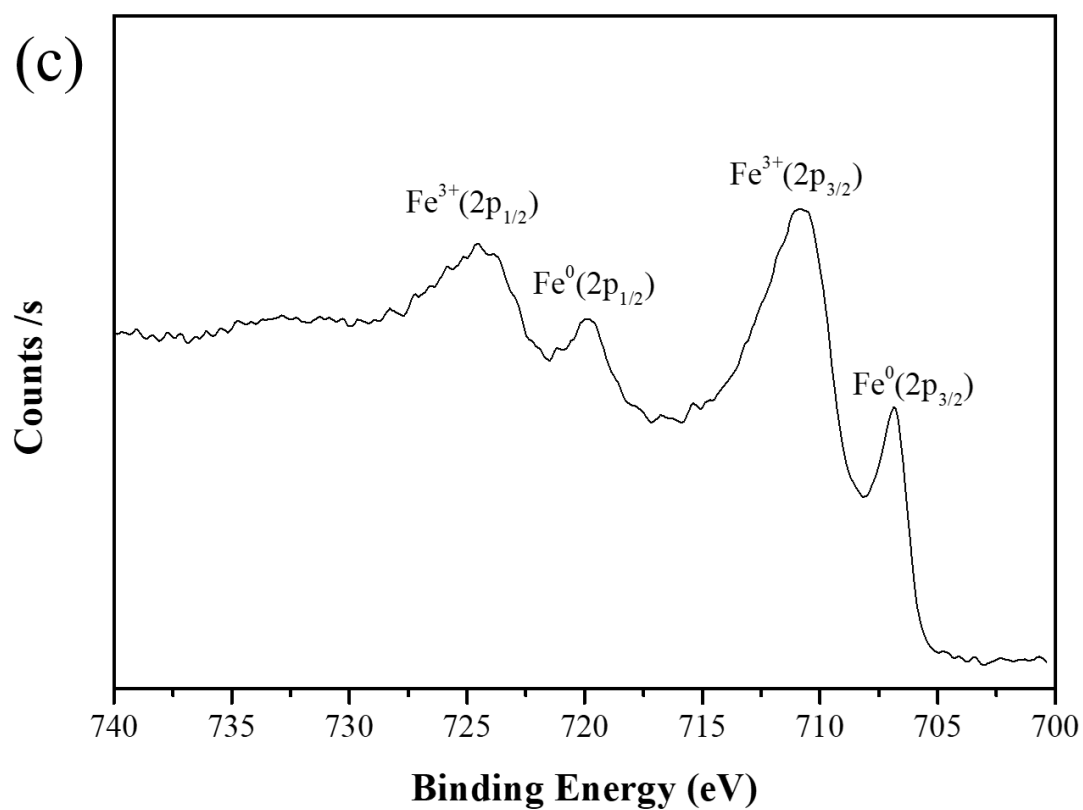

**Fig. S1.** Characterizations of the nZVI. (a) TEM, (b) XRD, (c) XPS analysis.

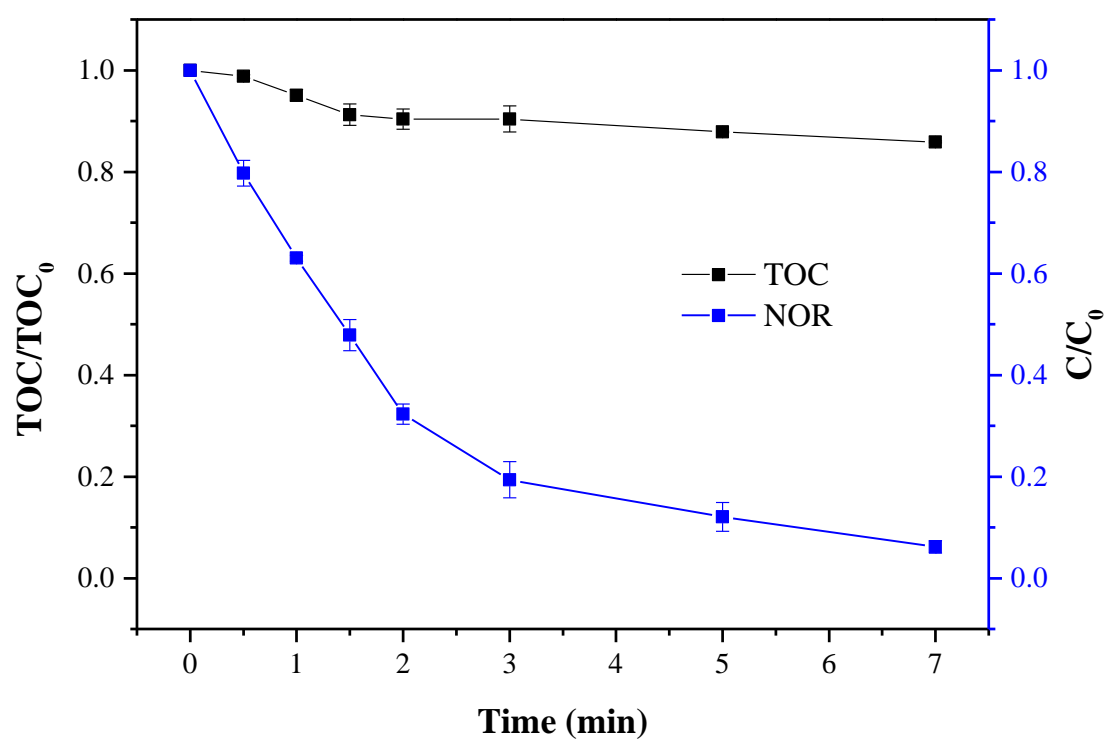

**Fig. S2.** Change profiles of TOC and NOR concentration versus time in the nZVI/PS

system. Operating conditions:  $C_0 = 100$  mg/L, pH = 7.0,  $T = 25$  °C,  $[PS]_0 = 12$  mM,  $nZVI = 0.1$  g/L.

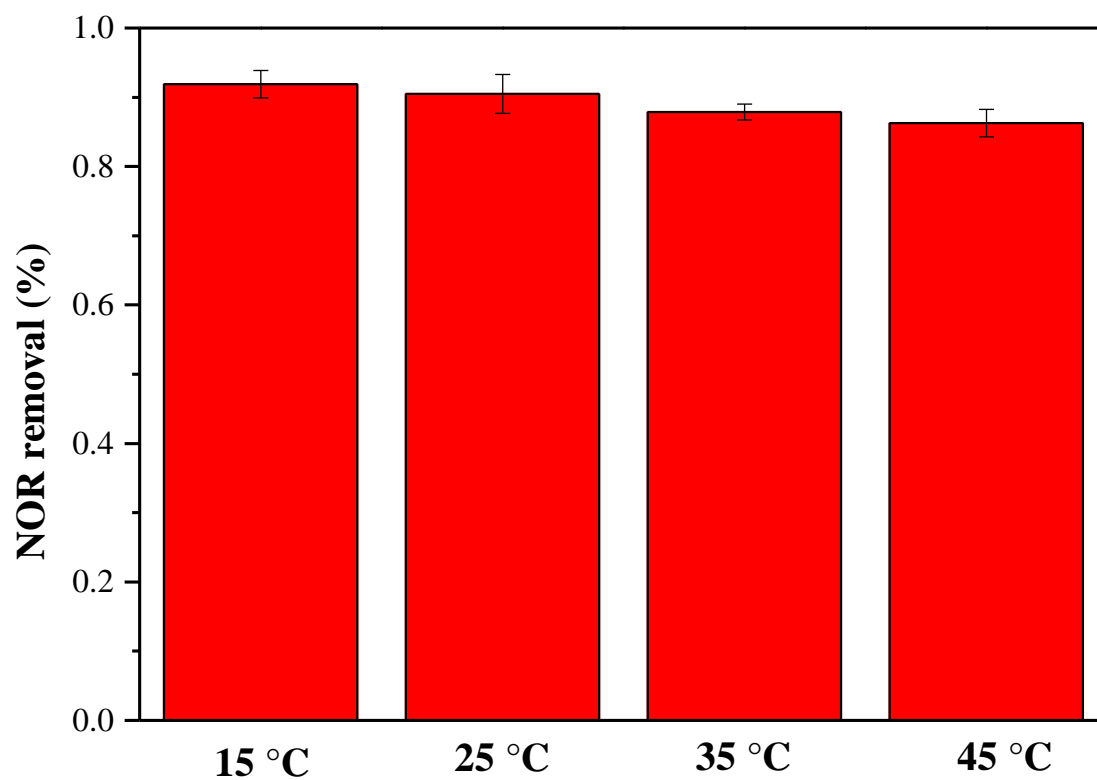

**Fig. S3.** The degradation efficiency of NOR in the PS system. Operating conditions:  $C_0 = 100$  mg/L, pH = 7.0,  $[PS]_0 = 12$  mM.

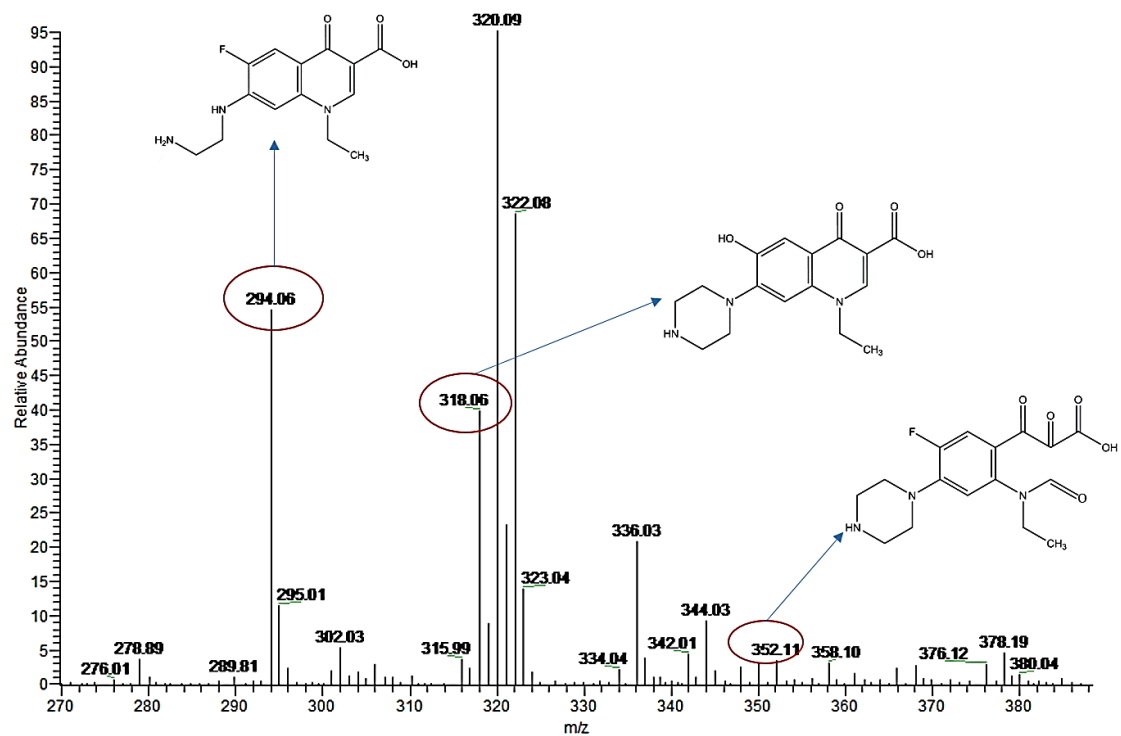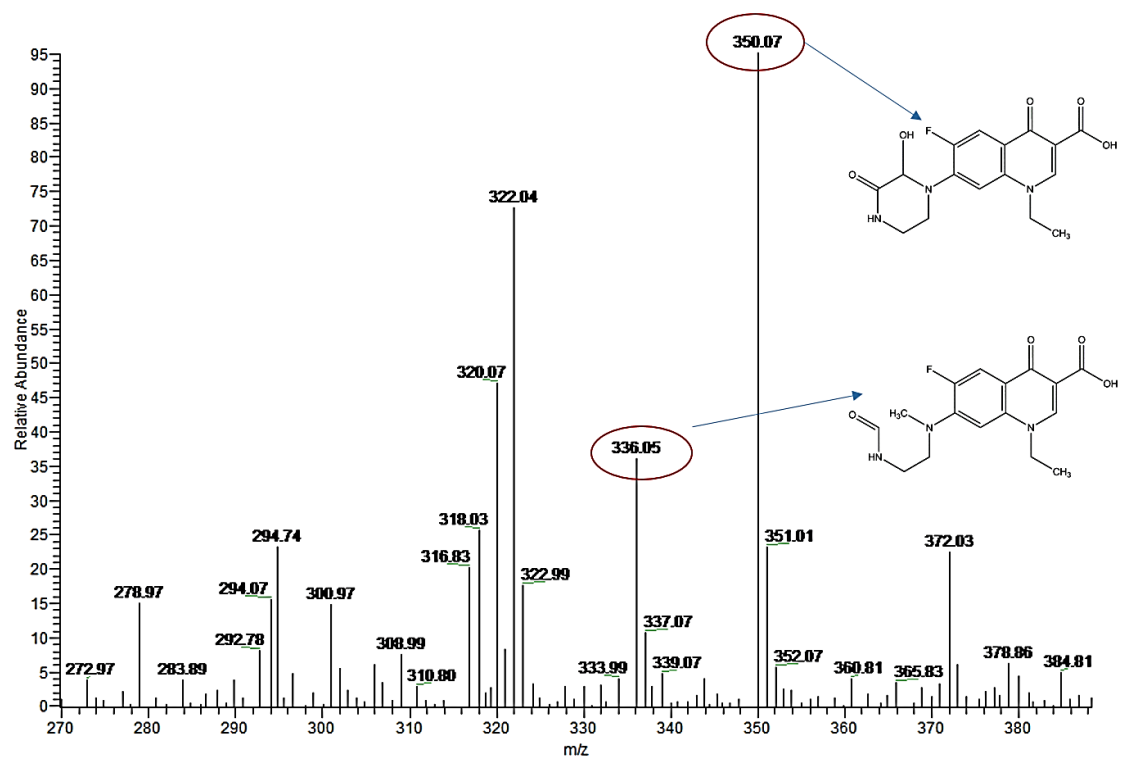

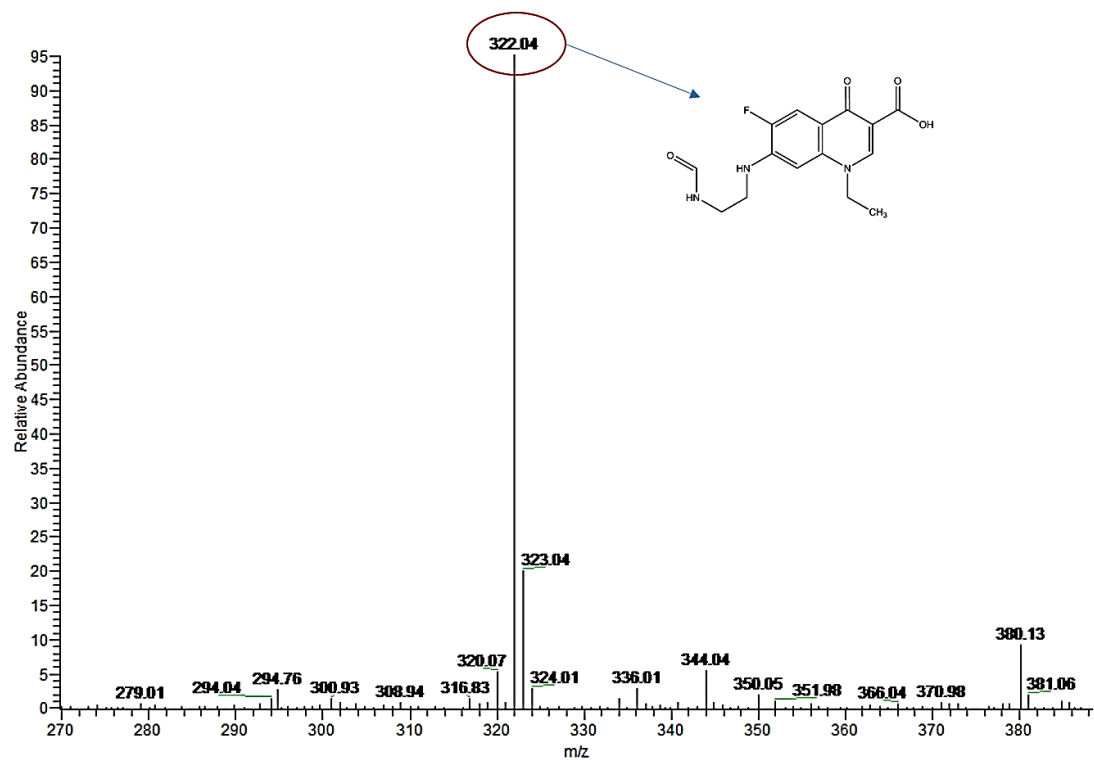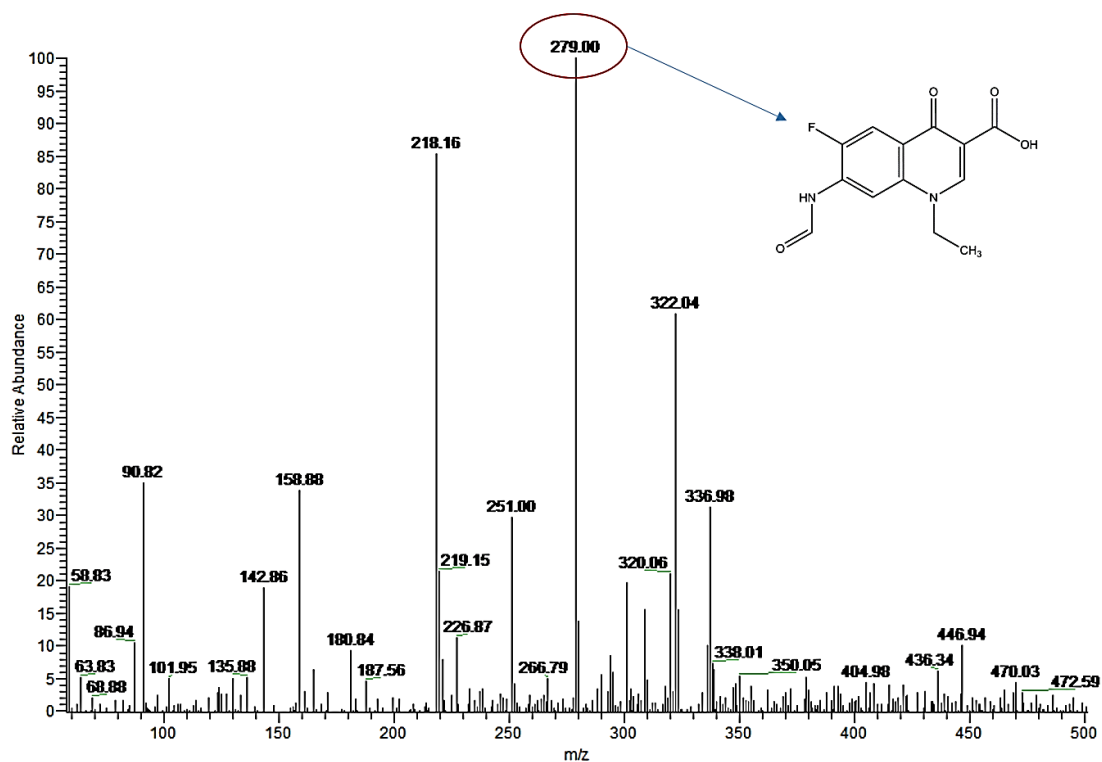

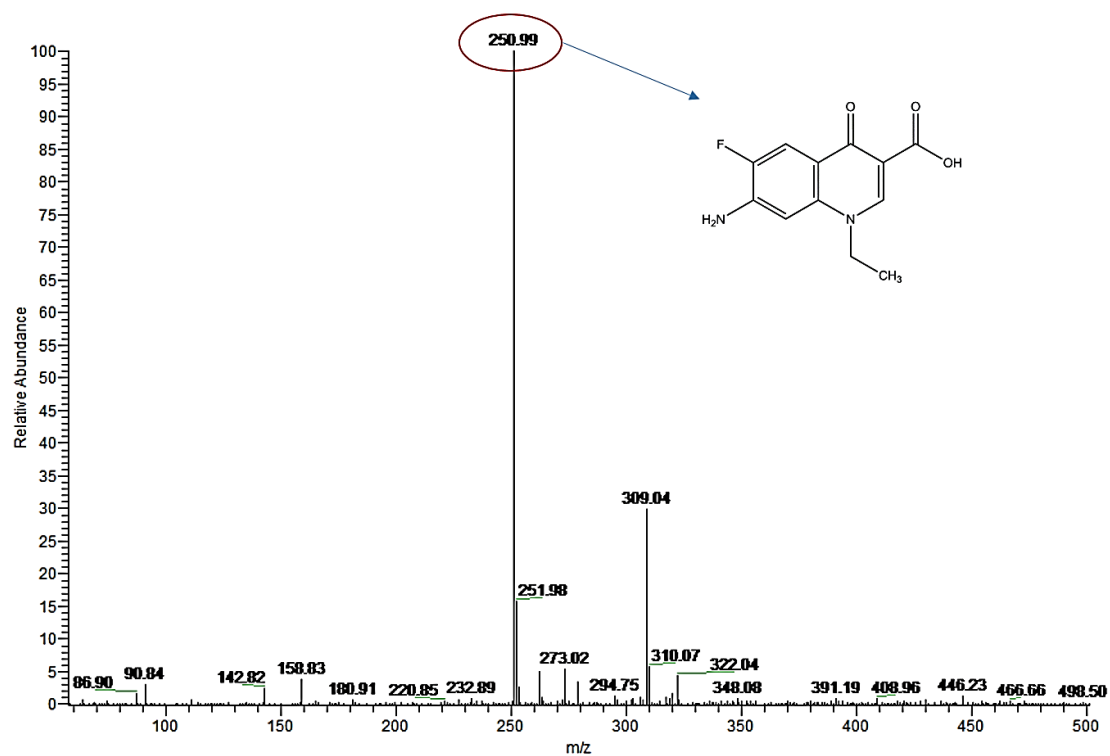

**Fig. S4.** MS spectra of degradation products of NOR in the nZVI-BC/PS system.

Graph abstract

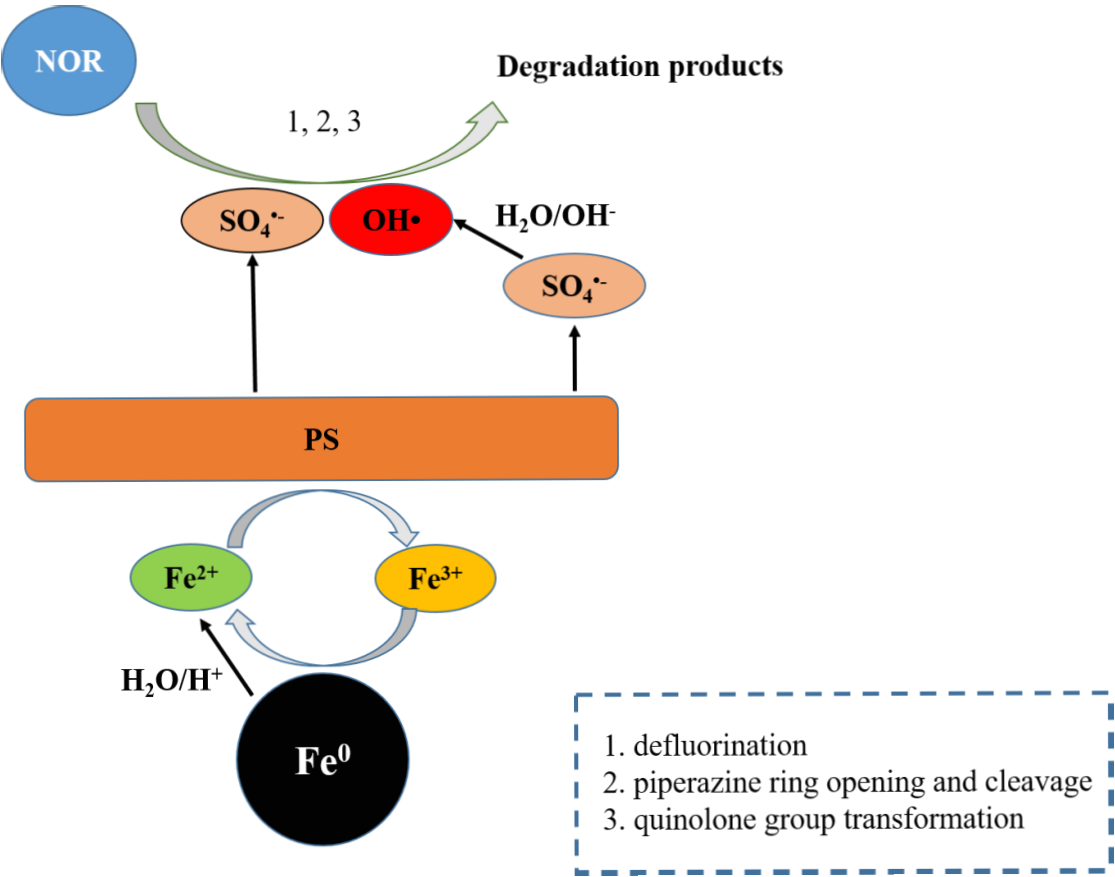

Supplement: f1 [file 3286383.f1.pdf]
